# Supplementary material for: Enhancement of the flavor and functional characteristics of cod protein isolate using an enzyme–microbe system
Source: Royal Society of Chemistry journal article supplement (doi:10.1039/d4fo02272f), 2024-01-01
Supplement: d4fo02272f1.pdf [file d4fo02272f1.pdf]

## **Enhancement of the flavor and functional characteristics of cod protein isolate using enzyme-microbe system**

Zheng-Fei Yan<sup>a, b\*</sup>, Jia-Yu Chen<sup>a, b #</sup>, Jing Yang<sup>a, b #</sup>, Shuai Yuan<sup>a, b</sup>, Xue-Yi Qiao<sup>c</sup>, Bo Xu<sup>c</sup>, Ling-Qia Su<sup>a, b\*</sup>

<sup>a</sup> School of Biotechnology and Key Laboratory of Industrial Biotechnology Ministry of Education, Jiangnan University, 1800 Lihu Avenue, Wuxi, 214122, China.

<sup>b</sup> International Joint Laboratory on Food Safety, Jiangnan University, 1800 Lihu Avenue, Wuxi, 214122, China.

<sup>c</sup> Zhengzhou Tobacco Research Institute of CNTC, Zhengzhou 450001, China

# These authors contributed equally to this work.

\* Corresponding author

Zheng-Fei Yan Tel: +86-510-85326653; E-mail: zhengfeiyan@jiangnan.edu.cn

Ling-Qia Su Tel: +86-510-85326653; E-mail: sulingqia@jiangnan.edu.cn

Table S1 Analysis of flavor compounds in different samples

| Compounds                               | Content ( $\mu\text{g}\cdot\text{g}^{-1}$ ) |         |        | Odor description                                                   |
|-----------------------------------------|---------------------------------------------|---------|--------|--------------------------------------------------------------------|
|                                         | CPI                                         | Syn3    | Syn4   |                                                                    |
| <b>Aldehyde</b>                         |                                             |         |        |                                                                    |
| Heptanal                                | 27.45                                       | 34.54   | 11.71  | Fishy odor, rancid taste, and oleogustus                           |
| (Z)-3-hexenal                           | 27.07                                       | -       | -      | Almond odor, bitterness, and grassy odor                           |
| (Z) 4-Heptanal                          | 8.71                                        | -       | -      | Oleogustus and fishy odor                                          |
| Isoprenol                               | -                                           | -       | 2.62   | -                                                                  |
| Octanal                                 | 33.62                                       | 28.2    | 6.74   | Grassy odor and rancid taste                                       |
| Nonanal                                 | 351.32                                      | 142     | -      | Fishy odor, rancid taste, oleogustus, and grassy odor              |
| Benzaldehyde                            | 242.52                                      | 1227.83 | -      | Almond odor, nutty, and cherry odor                                |
| Phenylacetaldehyde                      | 450.58                                      | -       | -      | Honey flavor, sweet taste, and floral fragrance                    |
| 2,4-Dimethylbenzaldehyde                | -                                           | 304.25  | -      | Caramel flavor                                                     |
| 2,5-Dimethylbenzaldehyde                | 28.01                                       | -       | -      | Floral fragrance                                                   |
| Furfural                                | -                                           | 842.4   | 28.24  | Sweetness, woody, and almond odor                                  |
| Decanal                                 | -                                           | -       | 68.52  | Sweetness, citrus scent, wax scent, and floral fragrance           |
| Nutmeg aldehyde                         | 64.36                                       | 29.08   | 17.19  | Oleogustus and creamy                                              |
| Pentadecanal                            | 44.74                                       | -       | -      | -                                                                  |
| Hexadecaldehyde                         | 136.45                                      | 40.63   | 11.38  | -                                                                  |
| 2,4-Dimethylbenzaldehyde                | -                                           | -       | 238.93 | Sweetness                                                          |
| Hexyl cinnamal                          | 18.53                                       | -       | 1.91   | A lasting jasmine scent, with hints of gardenia and herbal aromas. |
| 3,5-Di-tert-butyl-4-hydroxybenzaldehyde | 43.74                                       | 48.56   | -      | -                                                                  |
| 3-Hydroxy-4-methoxybenzaldehyde         | 13.92                                       | -       | -      | -                                                                  |
| Fourteen aldehyde                       | 13.23                                       | -       | -      | A strong peach aroma                                               |
| <b>Esters</b>                           |                                             |         |        |                                                                    |
| Methyl isobutyrate                      | -                                           | 2.97    | 1.44   | Features apple and pineapple fruit aromas, with an                 |

|                                                               |        |        |        |                                                                   |
|---------------------------------------------------------------|--------|--------|--------|-------------------------------------------------------------------|
|                                                               |        |        |        | almond-like flavor                                                |
| Methyl thioacetate                                            | -      | -      | 0.57   | The aroma of eggs and ripe vegetables, with a hint of sulfur.     |
| Methyl phenylacetate                                          | -      | -      | 5.82   | A honey-like sweetness with a slight musky aroma                  |
| Methyl salicylate                                             | 85.72  | 9.77   | 27.05  | Features a wintergreen herbal aroma, with a sweet and spicy taste |
| 2,2,4-Trimethyl-1,3-Pentanediol Diisobutyrate                 | 55.28  | 70.57  | 30.09  | -                                                                 |
| Diisobutyl adipate                                            | 25.55  | -      | -      | -                                                                 |
| Ethyl p-ethoxybenzoate                                        | -      | 192.24 | 88.08  | -                                                                 |
| Methyl palmitate                                              | 38.12  | 23.5   | 26.97  | -                                                                 |
| Isopropyl palmitate                                           | -      | -      | 57.26  | -                                                                 |
| Tetranitrobenzoate                                            | -      | -      | 21.98  | -                                                                 |
| Methyl stearate                                               | 20.57  | 20.01  | 6.15   | -                                                                 |
| Ethyl stearate                                                | -      | -      | 3.82   | Slightly waxy aroma                                               |
| Homosalate                                                    | -      | 5.49   | 11.32  | -                                                                 |
| 3-(3,5-Di-tert-butyl-4-hydroxyphenyl) propionate methyl ester | -      | 24.1   | 7.14   | -                                                                 |
| Diisobutyl phthalate                                          | 234.24 | 170.78 | 168.59 | Fragrant aroma                                                    |
| Benzyl benzoate                                               | -      | 16.08  | 6.43   | A light, almond-like aroma with a faint floral scent              |
| Dibutyl phthalate                                             | 363.99 | 87.73  | 70.99  | A faint unpleasant smell                                          |
| Octyl methoxycinnamate                                        | -      | 107.62 | -      | -                                                                 |
| <b>Alcohols</b>                                               |        |        |        |                                                                   |
| 2,2,2-Ethylhexanol                                            | 242.52 | -      | -      | Sweet taste, and slightly floral                                  |
| 2-(Base)-sunflower alcohol                                    | 3.08   | 155.72 | -      | -                                                                 |
| Ortho benzyl alcohol                                          | -      | 21.44  | -      | -                                                                 |
| <b>Ketones</b>                                                |        |        |        |                                                                   |

|                                         |        |        |        |                                                                                             |
|-----------------------------------------|--------|--------|--------|---------------------------------------------------------------------------------------------|
| 2,3-Pentanedione                        | -      | -      | 53.01  | Aromas of cream and caramel, with a nutty scent                                             |
| 2-Heptanone                             | -      | -      | 9.57   | A pear-like fruity aroma                                                                    |
| Methyl heptane ketone                   | 6.3    | -      | -      | Fruity aroma with a fresh, clean scent                                                      |
| 2-Nonanone                              | -      | -      | 2.64   | Features aromas of fruit, flowers, fats, and herbs                                          |
| Acetophenone                            | -      | -      | 89.65  | Sweet taste and a scent similar to oranges                                                  |
| Benzylidene acetone                     | 12.06  | 11.5   | -      | Pea aroma                                                                                   |
| Ortho aminoacetophenone                 | -      | -      | 0.39   | -                                                                                           |
| P-hydroxyacetophenone                   | -      | 52.67  | -      | -                                                                                           |
| 3,5-Di-tert-butyl-4-hydroxyacetophenone | -      | 5.04   | 1.33   | -                                                                                           |
| Benzophenone                            | -      | 54.08  | -      | A scent similar to roses                                                                    |
| <b>Phenols</b>                          |        |        |        |                                                                                             |
| Phenol                                  | 31.65  | 58.19  | 40.17  | Sour and burnt taste                                                                        |
| 4-Ethylphenol                           | 198.78 | -      | -      | A barnyard odor                                                                             |
| 2-Methoxy-4-ethylphenol                 | 42.6   | 14.21  | 19.63  | Features strong aromas of spices, cloves, and fermentation, with a scent of roasted peanuts |
| 4-Methoxyphenol                         | -      | -      | 2.77   | -                                                                                           |
| 2,4-Di-tert-butylphenol                 | 224.11 | 218.94 | 83.62  | Phenolic aroma                                                                              |
| <b>Acids</b>                            |        |        |        |                                                                                             |
| Valeric acid                            | -      | -      | 8.81   | Buttery smell                                                                               |
| 1-Cyclopentene carboxylic acid          | 10.68  | -      | -      | -                                                                                           |
| Nonanoic acid                           | 253.56 | 109.72 | 186.72 | Oleogustus                                                                                  |
| Caproic acid                            | -      | -      | 26.68  | An unpleasant dry coconut oil smell with a spicy taste                                      |
| Benzoic acid                            | 427.45 | -      | 208.15 | almond odor                                                                                 |
| Phenylacetic acid                       | 38.37  | -      | 18.69  | Unpleasant smell                                                                            |
| Lauric acid                             | 162.99 | 64.65  | 98.27  | Bay oil scent                                                                               |
| Butyric acid                            | -      | -      | 19.22  | A strong, unpleasant aroma reminiscent of cream and                                         |

|                            |        |        |        |                                                                                |
|----------------------------|--------|--------|--------|--------------------------------------------------------------------------------|
|                            |        |        |        | cheese, with a creamy taste                                                    |
| Octanoic acid              | -      | -      | 326.94 | A faint fruity acidity                                                         |
| <b>Pyrazines</b>           |        |        |        |                                                                                |
| 3-Ethyl-2,5-methylpyrazine | -      | 594.17 | -      | Roasted nuts, cocoa flavor, and a potato taste                                 |
| 2-Methylpyrazine           | -      | 44.42  | 63.68  | Aroma similar to beef when heated, with nutty and cocoa-like scents            |
| 2,5-Dimethylpyrazine       | 45.16  | 171.21 | 192.02 | Nutty, peanut, and roasted flavors.                                            |
| 2,6-Dimethylpyrazine       | -      | 58.39  | 42.15  | Roasted, coffee, peanut, and potato aromas                                     |
| 2-Ethyl-6-methylpyrazine   | -      | -      | 2.64   | Features aromas of fruit, flowers, fats, and herbs                             |
| 2,3,5-Trimethylpyrazine    | -      | 60.9   | 26.38  | Nutty, chocolate, coffee flavors                                               |
| 2-Vinylpyrazine            | -      | -      | 27.94  | -                                                                              |
| <b>Others</b>              |        |        |        |                                                                                |
| Dimethyl disulfide         | 116.09 | -      | -      | Garlic aroma, strong onion scent                                               |
| 2-Pentylfuran              | -      | 10.3   | -      | Bean aroma, fruit fragrance, earthiness, green aroma, and vegetable-like scent |
| Styrene                    | 24.52  | -      | 4.32   | Aromatic scent, spicy aroma                                                    |
| D-terpendiene              | -      | -      | 58.21  | A light floral scent, with flavors reminiscent of sweet orange and tangerine   |
| 1,2,4-Trimethylbenzene     | -      | 4.46   | 16.79  | Aromatic flavor                                                                |
| Dimethyl trisulfide        | 7.54   | -      | -      | Sulfurous odor \ fishy odor \ cooked onion flavor                              |
| 1,3-Dichlorobenzene        | 92.79  | -      | 588.87 | Aromatic flavor                                                                |
| Eucalyptus oleanol         | 25.13  | 6.57   | -      | Camphor scent and refreshing herbal flavor                                     |
| Naphthalene                | 0.37   | 128.61 | 124.22 | The scent of camphor wood, with a mild aromatic fragrance                      |
| Anethole                   | 7.26   | -      | -      | Similar to strong anise and hawthorn aromas                                    |
| Ligustrazine               | -      | 162.61 | 34.72  | Aroma when beef and pork fat are heated, and the                               |

|                                       |       |        |        |                                                                       |
|---------------------------------------|-------|--------|--------|-----------------------------------------------------------------------|
| 2,3-Dihydro-1,1,3-trimethyl-1H-indene | -     | -      | 43.43  | fermented soybean flavor                                              |
| Benzothiazole                         | 73.98 | 391.1  | 194.63 | -<br>Meaty flavor, vegetable taste, coffee flavor, and nutty<br>aroma |
| 1-Methylnaphthalene                   | -     | 302.12 | 530.77 | A scent similar to naphthalene                                        |

-, Not detected
